# Supplementary material for: Synthesis and structure of electron rich ruthenium polyhydride complexes and clusters containing AlCp* and GaCp*
Source: Royal Society of Chemistry journal article supplement (doi:10.1039/b807917j), 2008-11-06
Supplement: b807917j.pdf [file b807917j.pdf]

# **Synthesis and Structure of Electron Rich Ruthenium Polyhydride Complexes and Clusters Containing AlCp\* and GaCp\***

**Thomas Cadenbach, Timo Bollermann, Christian Gemel and Roland A. Fischer\***

*Anorganische Chemie II, Organometallics and Materials Chemistry, Ruhr University Bochum,  
Universitätsstraße 150, 44780 Bochum, Germany*

**Supporting Information**

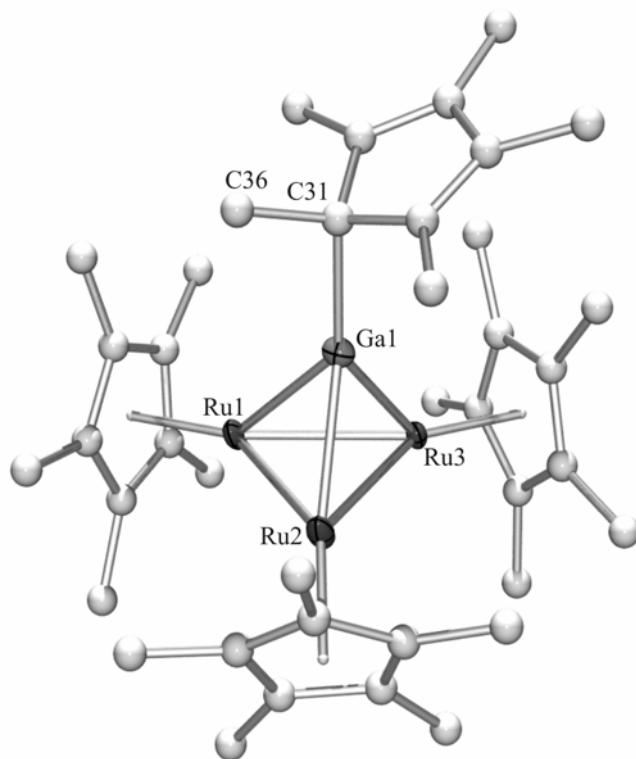

**Fig. 4** Molecular structure of  $[(\text{Cp}^*\text{Ru})_3(\mu\text{-H})_5(\mu^3\text{-GaCp}^*)]$  (**4**) as determined by single crystal X-ray crystallography (thermal ellipsoids are shown at the 50% probability level, H atoms were not located in the refinement and therefore not shown in the structure model above). Selected bond lengths (Å) and angles (°): Ru(1)-Ga(1) 2.4884(13), Ru(2)-Ga(1) 2.6926(14), Ru(3)-Ga(1) 2.4736(13), Ru(1)-Ru(2) 2.7074(11), Ru(1)-Ru(3) 3.0388(11), Ru(2)-Ru(3) 2.9959(11), Ga(1)-C(31) 2.026(10), Ru(1)-Cp\*<sub>centr.</sub> 1.839, Ru(2)-Cp\*<sub>centr.</sub> 1.827, Ru(3)-Cp\*<sub>centr.</sub> 1.834, Ga(1)-Ru<sub>centr.</sub> 1.919, Ru(1)Cp\*<sub>centr.</sub>-Ru(1)-Ru<sub>3centr.</sub> 174.09, Ru(2)Cp\*<sub>centr.</sub>-Ru(2)-Ru<sub>3centr.</sub> 172.31, Ru(3)Cp\*<sub>centr.</sub>-Ru(3)-Ru<sub>3centr.</sub> 146.01, Ga(1)-Ru(1)-Ru(2) 62.26(3), Ga(1)-Ru(1)-Ru(3) 52.02(3), Ga(1)-Ru(2)-Ru(1) 54.88(3), Ga(1)-Ru(2)-Ru(3) 51.21(3), Ga(1)-Ru(3)-Ru(2) 58.05(3), Ga(1)-Ru(3)-Ru(1) 52.46(3), Ru(2)-Ru(3)-Ru(1) 53.31(2), Ru(1)-Ga(1)-Ru(2) 62.86(4), Ru(2)-Ru(1)-Ru(3) 62.54(3), Ru(1)-Ru(2)-Ru(3) 64.16(3), C(36)-C(31)-Ga(1) 105.7(6)
